# Supplementary material for: Prevention of disease flares by risk-adapted stratification of therapy withdrawal in juvenile idiopathic arthritis: results from the PREVENT-JIA trial
Source: PubMed Central journal article supplement — Ann Rheum Dis. 2022 Mar 8;81(7):990–7. doi: 10.1136/annrheumdis-2021-222029 (PMC9209679; doi:10.1136/annrheumdis-2021-222029), 2022-03-08
Supplement: annrheumdis-2021-222029supp001.pdf [file annrheumdis-2021-222029supp001.pdf]

## SUPPLEMENTARY MATERIAL

### **Prevention of disease flares by risk-adapted stratification of therapy withdrawal in juvenile idiopathic arthritis: Results from the PREVENT-JIA trial**

Joachim Gerss<sup>1</sup>, Monika Tedy<sup>2</sup>, Gerd Horneff<sup>3,4</sup>, Maria Miranda-Garcia<sup>5</sup>, Christoph Kessel<sup>2</sup>, Dirk Holzinger<sup>6</sup>, Ariane Klein<sup>3</sup>, Valda Stanevica<sup>7</sup>, Joost F. Swart<sup>8</sup>, David A. Cabral<sup>9</sup>, Hermine I. Brunner<sup>10</sup>, Dirk Foell<sup>2,11</sup>

<sup>1</sup> Institute of Biostatistics and Clinical Research, University of Muenster, Germany

<sup>2</sup> Department of Pediatric Rheumatology and Immunology, University Hospital Muenster, Germany

<sup>3</sup> Asklepios Children's Hospital, Sankt Augustin, Germany

<sup>4</sup> Medical Faculty, University of Cologne, Cologne, Germany

<sup>5</sup> Department of Pediatrics, University Hospital Ulm, Germany

<sup>6</sup> Department of Pediatric Hematology-Oncology University of Duisburg-Essen, Essen, Germany

<sup>7</sup> Department of Pediatrics, Riga Stradins University Children's Hospital Riga, Latvia

<sup>8</sup> Department of Pediatric Immunology and Rheumatology, Wilhelmina Children's Hospital, UMC Utrecht, The Netherlands

<sup>9</sup> Division of Pediatric Rheumatology, BC Children's Hospital, University of British Columbia, Vancouver, Canada

<sup>10</sup> Division of Pediatric Rheumatology, Cincinnati Children's Hospital Medical Center, Ohio, USA

<sup>11</sup> Interdisciplinary Center of Clinical Research, University Hospital Münster, Germany

#### **Corresponding author:**

Prof. Dr. med. Dirk Foell

Department of Pediatric Rheumatology and Immunology

University Hospital Münster

Albert-Schweitzer-Campus 1, Building D3

D-48149 Muenster

Email: dfoell@uni-muenster.de

**Suppl. Table S1. Inclusion and exclusion criteria of the PREVENT-JIA study**

| <b>Inclusion criteria</b>                                                                                                                                                                     | <b>Exclusion criteria</b>                                                                         |
|-----------------------------------------------------------------------------------------------------------------------------------------------------------------------------------------------|---------------------------------------------------------------------------------------------------|
| Any JIA subcategory                                                                                                                                                                           | Persistent Oligoarthritis<br>Systemic JIA with systemic features within 1 year prior to inclusion |
| Clinically inactive disease<br>No joint with active arthritis<br>No fever<br>No rash<br>No serositis<br>No splenomegaly<br>No lymphadenopathy<br>No active uveitis<br>No elevation in ESR/CRP | History of MAS                                                                                    |
| Physicians global assessment of disease activity indicates no activity for at least 6 months                                                                                                  | History of active Uveitis                                                                         |
| Approved medication: DMARDs and/ or biologics on a stable dose; (+/- NSAIDs)                                                                                                                  | Withdrawal of any biological drug in past has been unsuccessful                                   |
| Steroids withdrawn at least 1 month before remission                                                                                                                                          | Steroids in the month before remission                                                            |
| No Intraarticular joint injections within the last 6 months before remission                                                                                                                  | Intraarticular joint injections within the last 6 months before remission                         |

**Suppl. Table S2. Criteria of inactive disease and remission**

|                                                                                                                                                                                                                                                                                                                                                                                                                                     |
|-------------------------------------------------------------------------------------------------------------------------------------------------------------------------------------------------------------------------------------------------------------------------------------------------------------------------------------------------------------------------------------------------------------------------------------|
| <b>Clinically inactive disease</b>                                                                                                                                                                                                                                                                                                                                                                                                  |
| <ul style="list-style-type: none"><li>• No joints with active arthritis</li><li>• No fever, rash, serositis, splenomegaly, or generalized lymphadenopathy attributable to JIA</li><li>• No active uveitis</li><li>• Normal ESR or CRP (if both are tested, both must be normal)</li><li>• Physician's global assessment of disease activity indicates no disease activity (i.e., best score attainable on the scale used)</li></ul> |
| <b>Clinical remission on medication</b>                                                                                                                                                                                                                                                                                                                                                                                             |
| The criteria for inactive disease must be met for a minimum of 6 continuous months while the patient is on medication                                                                                                                                                                                                                                                                                                               |
| <b>Clinical remission off medication</b>                                                                                                                                                                                                                                                                                                                                                                                            |
| The criteria for inactive disease must be met for a minimum of 12 continuous months while off all anti-arthritis and anti-uveitis medications                                                                                                                                                                                                                                                                                       |

**Suppl. Table S3. Final medication in the PREVENT-JIA group and the respective BiKeR control group**

|                         | Patients who reached I1 under medication |                  | Patients who stopped therapy following I1 |                  |
|-------------------------|------------------------------------------|------------------|-------------------------------------------|------------------|
|                         | PREVENT-JIA                              | BiKeR (matched)  | PREVENT-JIA                               | BiKeR            |
| <b>All Patients</b>     | 100 <sup>1</sup>                         | 100 <sup>2</sup> | 91 <sup>3</sup>                           | 118 <sup>4</sup> |
| <b>cDMARDs</b>          |                                          |                  |                                           |                  |
| MTX                     | 77 (77%)                                 | 79 (79%)         | 70 (77%)                                  | 33 (28%)         |
| Leflunomid              | 2 (2%)                                   | 0                | 2 (2%)                                    | 0                |
| <b>bDMARDs</b>          |                                          |                  |                                           |                  |
| Abatacept               | 2 (2%)                                   | 0                | 2 (2%)                                    | 0                |
| Adalimumab              | 4 (4%)                                   | 1 (1%)           | 4 (4%)                                    | 6 (5%)           |
| Canakinumab             | 0                                        | 0                | 0                                         | 0                |
| Etanercept              | 12 (12%)                                 | 10 (10%)         | 10 (11%)                                  | 46 (39%)         |
| Golimumab               | 0                                        | 0                | 0                                         | 0                |
| Infliximab              | 0                                        | 0                | 0                                         | 0                |
| Tocilizumab             | 0                                        | 1 (1%)           | 0                                         | 1 (1%)           |
| <b>Combination</b>      |                                          |                  |                                           |                  |
| MTX + Abatacept         | 1 (1%)                                   | 1 (1%)           | 1 (1%)                                    | 0                |
| MTX + Adalimumab        | 0                                        | 1 (1%)           | 0                                         | 5 (4%)           |
| Leflunomid + Adalimumab | 0                                        | 0                | 0                                         | 1 (1%)           |
| MTX + Canakinumab       | 0                                        | 1 (1%)           | 0                                         | 0                |
| MTX + Etanercept        | 1 (1%)                                   | 5 (5%)           | 1 (1%)                                    | 17 (14%)         |
| MTX + Golimumab         | 0                                        | 0                | 0                                         | 3 (3%)           |
| MTX + Infliximab        | 0                                        | 1 (1%)           | 0                                         | 2 (2%)           |
| MTX + Tocilizumab       | 1 (1%)                                   | 0                | 1 (1%)                                    | 4 (3%)           |

<sup>1</sup> PREVENT-JIA patients who reached the first intervention time point I1.

<sup>2</sup> Of the 430 eligible patients from the BiKeR registry who reached clinical remission on medication, remained inactive for at least further 6 months on medication and reached the corresponding first intervention time point I1, 100 patients were selected so that the JIA subtype and the type of final therapy of a pair of individual PREVENT-JIA and BiKeR patients matched exactly (final therapy type 1: csDMARD without additional bDMARDs, type 2: bDMARDs with or without additional csDMARD), and the duration of therapy matched as well as possible (duration from treatment start until inactive disease on stable medication).

<sup>3</sup> PREVENT-JIA patients who stopped treatment within the one-year intervention phase.

<sup>4</sup> A number of 118 eligible patients from the BiKeR registry reached the corresponding first intervention time point I1 and stopped treatment within a one-year period corresponding to the intervention phase of the PREVENT-JIA study.

## Suppl. Figure S1. Biomarker values

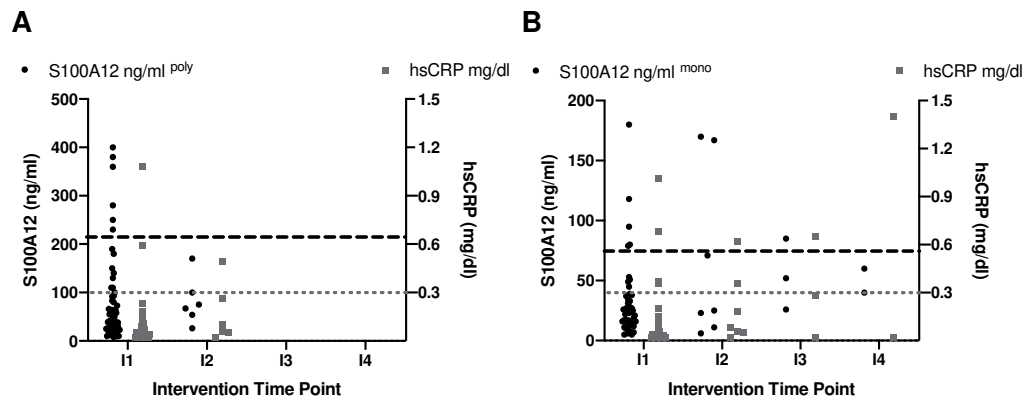

**A)** Results for S100A12 (black circles) and hsCRP (grey squares) obtained in patient samples (I1: n=53; I2: n=6) in which the polyclonal S100A12 assay was used. The black dashed line indicates the assay-specific S100A12 cut-off at 175 ng/ml, while the grey dotted line shows the cut-off for hsCRP at 0.3 mg/dl. The polyclonal S100A12 assay was applied until June 2015 and therefore not used for any samples at later intervention time points I3 or I4. **B)** Results of the monoclonal S100A12 ELISA (black circles) and hsCRP (grey squares) for samples (n=59; I1: n=47; I2: n=7; I3: n=2; I4: n=2) collected beyond June 2015. The black dashed line indicates the assay-specific S100A12 cut-off at 75 ng/ml, while the grey dotted line shows the cut-off for hsCRP at 0.3 mg/dl.
